# Supplementary material
Source: publisher site journal article supplement (https://www.dovepress.com/article/393703)
Supplement: Supplementary file 1 [file get_supplementary_file.php]

**
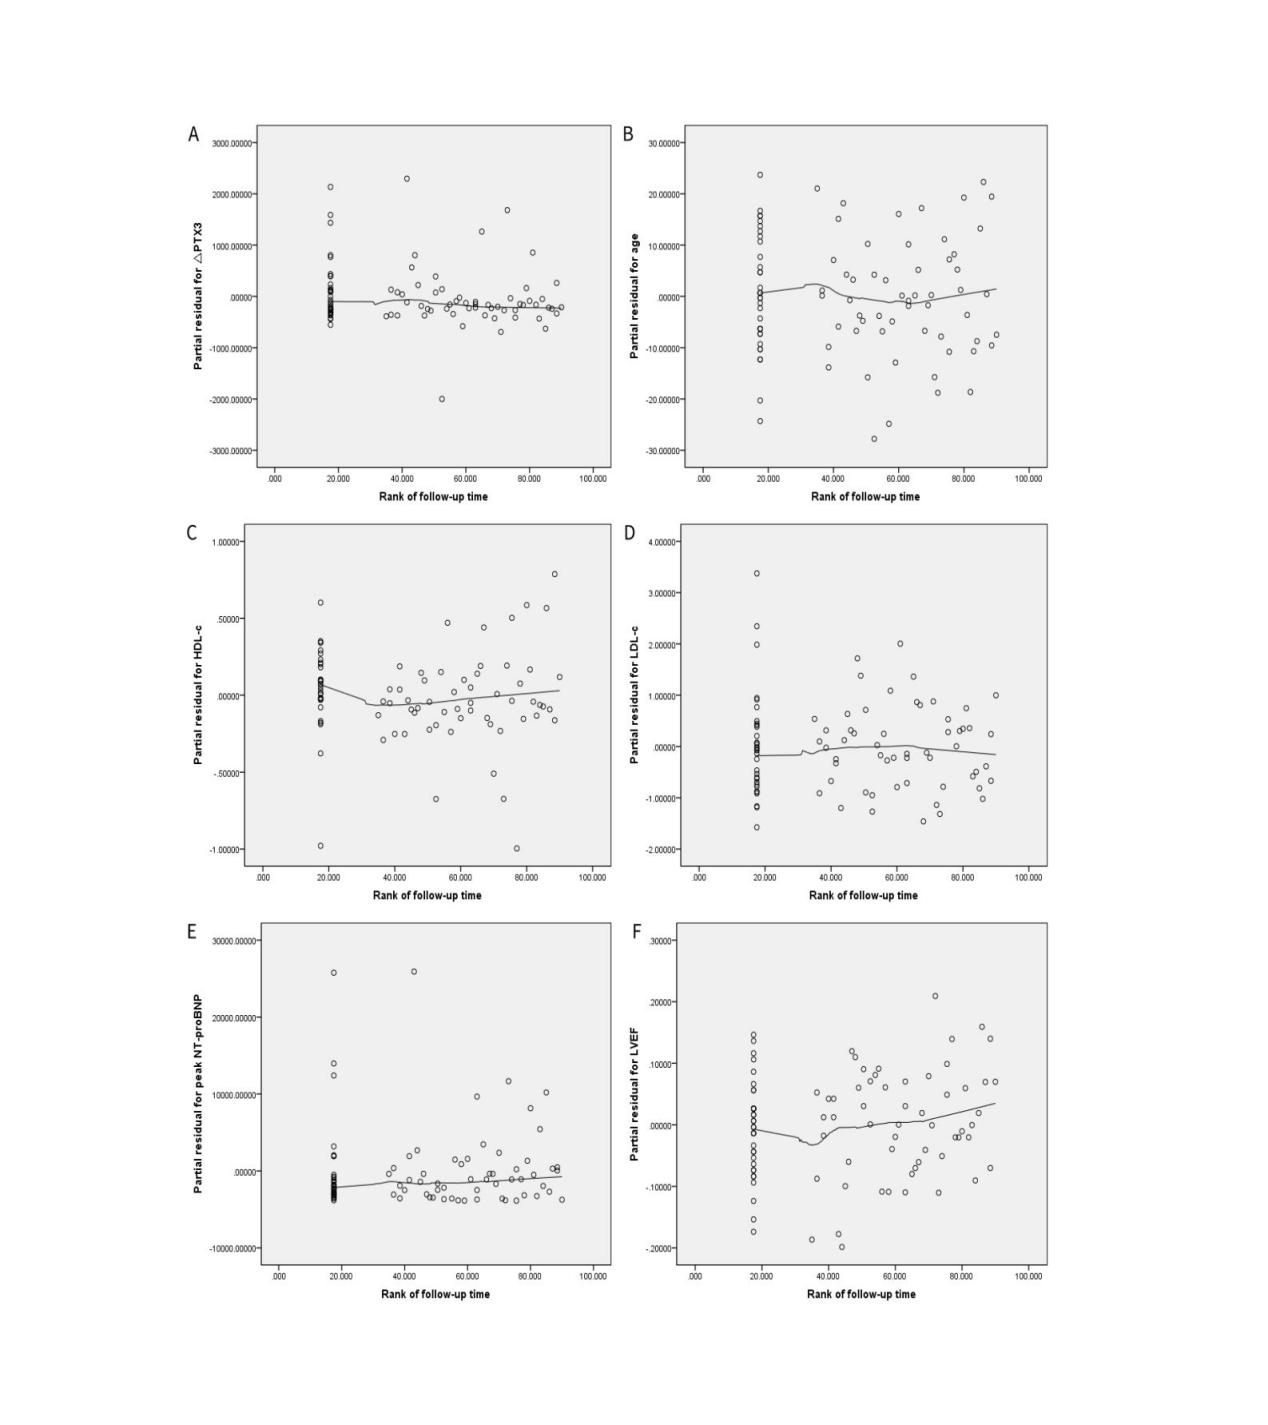
**

**Supplementary** **Figure 1.** Simple scatter diagram of partial residual for △PTX3 (A), age (B), HDL-c (C), LDL-c (D), peak NT-proBNP (E), and LVEF (F) and the rank of follow-up time.

**Abbreviations:** PTX3, pentraxin 3; △PTX3, the change in PTX3 from admission to post-pPCI 24-hour; HDL-C, high-density lipoprotein cholesterol; LDL-C, low-density lipoprotein cholesterol; LVEF, left ventricular ejection fraction.

**Supplementary Table 1.** Correlation between partial residual and time rank

|  | Partial residual | △PTX3 | Age | HDL-c | LDL-c | Peak NT-proBNP | LVEF |
| --- | --- | --- | --- | --- | --- | --- | --- |
| Rank of follow-up time | r | -0.152 | -0.027 | -0.04 | -0.039 | 0.029 | 0.152 |
| p | 0.153 | 0.799 | 0.707 | 0.717 | 0.789 | 0.153 |

**Abbreviations:** PTX3, pentraxin 3; △PTX3, the change in PTX3 from admission to post-pPCI 24-hour; HDL-C, high-density lipoprotein cholesterol; LDL-C, low-density lipoprotein cholesterol; LVEF, left ventricular ejection fraction.
